# Supplementary material for: Apigenin protects ischemic stroke by regulating intestinal microbiota homeostasis, regulates brain metabolic profile
Source: Front Pharmacol. 2025 Mar 7;16:1553081. doi: 10.3389/fphar.2025.1553081 (PMC11925864; doi:10.3389/fphar.2025.1553081)
Supplement: Supplementary file 1 [file Table1.xlsx]

## Sheet: Sheet 1
pathway_id
